# Supplementary material
Source: publisher figshare collection journal article supplement (https://karger.figshare.com/ndownloader/files/27359651)
Supplement: Supplementary file 1 [file 27359651]

**Supplemental Table 2** Mean Changes in Central Subfield Thickness Compared to Baseline for the Entire Population and Stratified by Presenting Visual Acuity Groups (Last Observation Carried Forward)

| **Mean Change in CSFT from Baseline** | **Overall** | | | **Moderate to Severe Visual Impairment** | | | **Mild Visual Impairment** | | | |
| --- | --- | --- | --- | --- | --- | --- | --- | --- | --- | --- |
| **Mean** | **95% CI** | **P Value** | **Mean** | **95% CI** | **P Value** | **Mean** | **95% CI** | **P Value** | |
| At 12 months | -121.7 | -137.9 to -105.6 | <0.001 | -136.9 | -155.3 to -118.5 | <0.001 | -79.1 | -109.2 to  -49.0 | <0.001 | |
| At 24 months | -142.1 | -159.1 to  -125.2 | <0.001 | -164.9 | -184.4 to -145.5 | <0.001 | -80.7 | -112.1 to  -49.4 | <0.001 | |
| At 36 months | -163.6 | -181.9 to -145.4 | <0.001 | -182.3 | -203.4 to -161.2 | <0.001 | -113.1 | -146.6 to  -79.7 | <0.001 | |
| *CSFT = central subfield thickness, CI = confidence interval* | | | | | | | | | |
